# Supplementary material for: Associations of Plasma Concentration Profiles of Dapagliflozin, a Selective Inhibitor of Sodium–Glucose Co-Transporter Type 2, with Its Effects in Japanese Patients with Type 2 Diabetes Mellitus
Source: MDPI journal article supplement (doi:10.3390/ph15020203), 2022-02-07
Supplement: s1 [file s1]

Table S1 Univariate and multivariate analyses on changes in body weight after 12 months of treatment with 5 mg/day of dapagliflozin

| Variables                        |                    | Univariate analysis |       | Multivariate analysis |         |       |
|----------------------------------|--------------------|---------------------|-------|-----------------------|---------|-------|
|                                  |                    | r                   | p     | B                     | $\beta$ | p     |
| Sex, male: female                | 52: 20             | 0.104               | 0.386 |                       |         |       |
| Age, years                       | 58.4 $\pm$ 10.6 a) | −0.087              | 0.469 |                       |         |       |
| Body weight, kg                  | 77.9 $\pm$ 13.5 a) | 0.059               | 0.625 |                       |         |       |
| T2DM duration, years             | 10.8 $\pm$ 7.7 a)  | 0.169               | 0.157 |                       |         |       |
| HbA1c level, %                   | 6.9 $\pm$ 0.6 a)   | 0.084               | 0.480 |                       |         |       |
| eGFR, mL/min/1.73 m <sup>2</sup> | 78.8 $\pm$ 20.7 a) | 0.017               | 0.892 |                       |         |       |
| Systolic BP, mmHg                | 130 $\pm$ 16 a)    | −0.135              | 0.259 |                       |         |       |
| Diastolic BP, mmHg               | 73 $\pm$ 12 a)     | −0.189              | 0.112 | −0.035                | −0.157  | 0.181 |
| Diabetic nephropathy             | 27 of 72           | 0.134               | 0.264 |                       |         |       |
| Hypertension                     | 53 of 72           | 0.104               | 0.387 |                       |         |       |
| Hypercholesterolemia             | 54 of 72           | 0.202               | 0.089 | 1.045                 | 0.178   | 0.132 |
| Average of Cp b), ng/mL          | 4.7 $\pm$ 2.3 a)   | −0.156              | 0.288 |                       |         |       |
| Stable Cp b, c)                  | 13 of 72           | −0.197              | 0.098 | −1.327                | −0.201  | 0.085 |

Variables with  $p < 0.20$  by univariate analysis were used for multivariate analysis, and the results were presented as Pearson's correlation; r: correlation coefficient, B: unstandardized estimated regression coefficient,  $\beta$ : standardized estimated regression coefficient.

a) The data presented were the mean  $\pm$  SD of 72 patients.

b) Cp: plasma concentration

c) Based on a well-organized clinical trial [14], patients with stable concentration were defined as those with average plasma concentrations of 2–5 ng/mL with a CV%  $< 30\%$ .

Table S2 Univariate and multivariate analyses on changes in eGFR after 12 months of treatment with 5 mg/day of dapagliflozin

| Variables                        |                    | Univariate analysis |       | Multivariate analysis |         |       |
|----------------------------------|--------------------|---------------------|-------|-----------------------|---------|-------|
|                                  |                    | r                   | p     | B                     | $\beta$ | p     |
| Sex, male: female                | 52: 20             | 0.121               | 0.318 |                       |         |       |
| Age, years                       | 58.4 $\pm$ 10.6 a) | −0.014              | 0.910 |                       |         |       |
| Body weight, kg                  | 77.9 $\pm$ 13.5 a) | 0.122               | 0.313 |                       |         |       |
| T2DM duration, years             | 10.8 $\pm$ 7.7 a)  | −0.228              | 0.058 | −0.259                | −0.212  | 0.072 |
| HbA1c level, %                   | 6.9 $\pm$ 0.6 a)   | 0.014               | 0.909 |                       |         |       |
| eGFR, mL/min/1.73 m <sup>2</sup> | 78.8 $\pm$ 20.7 a) | −0.028              | 0.819 |                       |         |       |
| Systolic BP, mmHg                | 130 $\pm$ 16 a)    | −0.169              | 0.163 | −0.092                | −0.152  | 0.196 |
| Diastolic BP, mmHg               | 73 $\pm$ 12 a)     | −0.009              | 0.940 |                       |         |       |
| Diabetic nephropathy             | 27 of 72           | −0.085              | 0.488 |                       |         |       |
| Hypertension                     | 53 of 72           | −0.231              | 0.054 | −4.272                | −0.200  | 0.091 |
| Hypercholesterolemia             | 54 of 72           | −0.006              | 0.959 |                       |         |       |
| Average of Cp b), ng/mL          | 4.7 $\pm$ 2.3 a)   | 0.032               | 0.833 |                       |         |       |
| Stable Cp b, c)                  | 13 of 72           | 0.102               | 0.403 |                       |         |       |

Variables with  $p < 0.20$  by univariate analysis were used for multivariate analysis, and the results were presented as Pearson's correlation; r: correlation coefficient, B: unstandardized estimated regression coefficient,  $\beta$ : standardized estimated regression coefficient.

a) The data were presented as the mean  $\pm$  SD of 72 patients.

b) Cp: plasma concentration

c) Based on a well-organized clinical trial [14], patients with stable concentration were defined as those with average plasma concentrations of 2–5 ng/mL with a CV%  $< 30\%$ .
